# Supplementary material for: Co3O4 nanocrystals derived from a zeolitic imidazolate framework on Ni foam as high-performance supercapacitor electrode material
Source: Royal Society of Chemistry journal article supplement (doi:10.1039/c6ra11272b), 2016-01-01
Supplement: c6ra11272b1.pdf [file c6ra11272b1.pdf]

Electronic Supplementary Material (ESI) for RSC Advances.

This journal is © The Royal Society of Chemistry 2016

**Supplementary Information**

**Co<sub>3</sub>O<sub>4</sub> nanocrystals derived from zeolitic imidazolate framework on Ni foam as  
high-performance supercapacitor electrode material**

**Jinlin Yang, Fuxiang Wei\*, Yanwei Sui\*, Jiqui Qi, Yezeng He, Qingkun Meng,  
Shuai Zhang**

**School of Materials Science & Engineering, China University of Mining and  
Technology, Xuzhou, Jiangsu 221008, PR China**

**\*Correspondence and requests for materials should be addressed to F.W. (E-mail:  
[weifuxiang2001@163.com](mailto:weifuxiang2001@163.com)) or Y.S. (E-mail: [suiyanwei163@163.com](mailto:suiyanwei163@163.com) )**

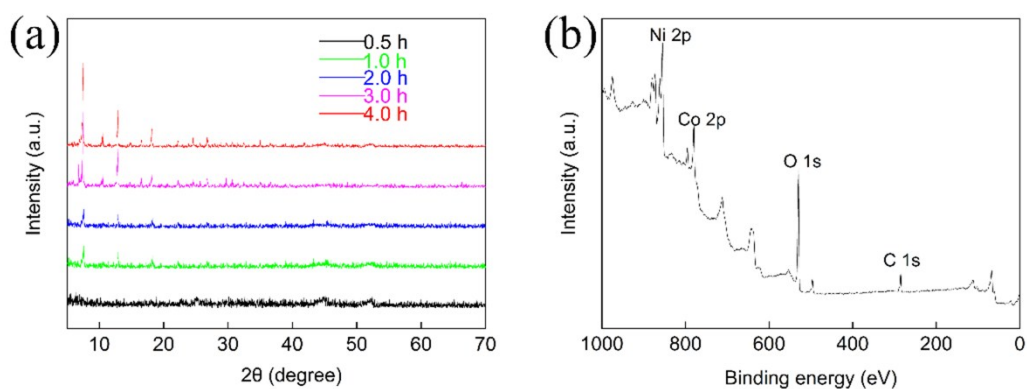

**Fig. S1.** (a) XRD pattern of ZIF-67 membranes prepared by one step in situ method for different synthesis times (0.5, 1, 2, and 4 h), (b) the full-survey-scan XPS spectrum of as-prepared Ni foam/Co<sub>3</sub>O<sub>4</sub> electrode.

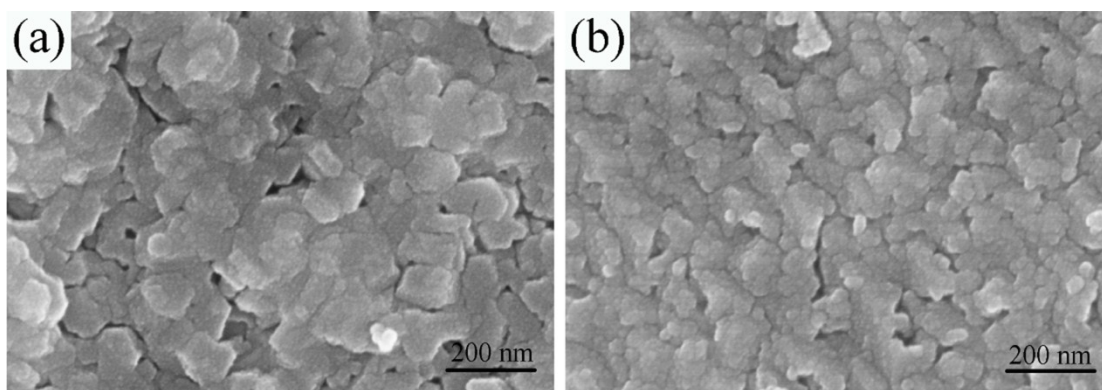

**Fig. S2.** High-resolution SEM images of (a) before-test Co<sub>3</sub>O<sub>4</sub> nanocrystals and (b) after-test Co<sub>3</sub>O<sub>4</sub> nanocrystals.

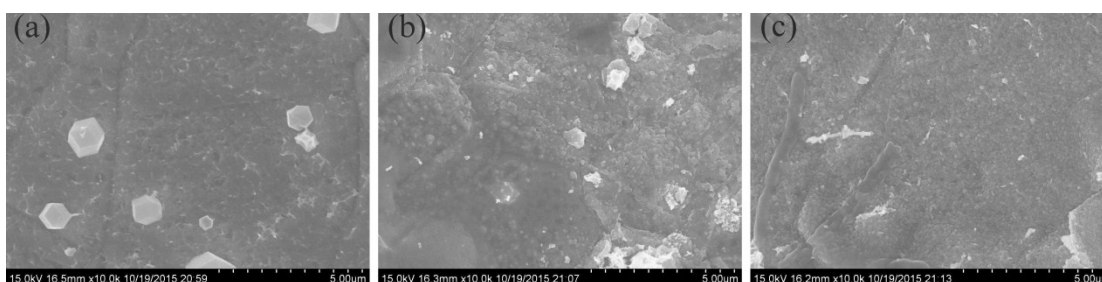

**Fig. S3.** Low-resolution SEM images of (a) Ni foam/ZIF-67, (b) before-test Ni foam/Co<sub>3</sub>O<sub>4</sub> and (c) after-test Ni foam/Co<sub>3</sub>O<sub>4</sub>.

**Table. S1.** Summary of the representative Co<sub>3</sub>O<sub>4</sub> electrode materials for supercapacitors

| Typical examples                                                                                    | Specific capacitance                              | Rate performance                                | Ref.         |
|-----------------------------------------------------------------------------------------------------|---------------------------------------------------|-------------------------------------------------|--------------|
| Two-dimensional (2D) Co <sub>3</sub> O <sub>4</sub> thin sheets                                     | 1500 F g <sup>-1</sup> at 1 A g <sup>-1</sup>     | 828 F g <sup>-1</sup> at 10 A g <sup>-1</sup>   | 1            |
| One-dimensional (1D) hierarchical hollow Co <sub>3</sub> O <sub>4</sub> nanotubes                   | 1006 F g <sup>-1</sup> at 1 A g <sup>-1</sup>     | 512 F g <sup>-1</sup> at 10 A g <sup>-1</sup>   | 2            |
| Co <sub>3</sub> O <sub>4</sub> nanopillar array incorporated in hierarchical porous carbon          | 978.9 F g <sup>-1</sup> at 0.5 A g <sup>-1</sup>  | 444.4 F g <sup>-1</sup> at 10 A g <sup>-1</sup> | 3            |
| Mesoporous vertical Co <sub>3</sub> O <sub>4</sub> nanosheet arrays on nitrogen-doped graphene foam | 451 F g <sup>-1</sup> at 1 A g <sup>-1</sup>      | 260 F g <sup>-1</sup> at 20 A g <sup>-1</sup>   | 4            |
| Co <sub>3</sub> O <sub>4</sub> @highly ordered macroporous carbon                                   | 1307 F g <sup>-1</sup> at 1 A g <sup>-1</sup>     | 798 F g <sup>-1</sup> at 20 A g <sup>-1</sup>   | 5            |
| Multi-shelled Co <sub>3</sub> O <sub>4</sub> hollow microspheres                                    | 394.4 F g <sup>-1</sup> at 2 A g <sup>-1</sup>    | 360 F g <sup>-1</sup> at 10 A g <sup>-1</sup>   | 6            |
| Core-shell structured PANI-Co <sub>3</sub> O <sub>4</sub> nanocomposites                            | 1184 F g <sup>-1</sup> at 1.25 A g <sup>-1</sup>  | 735 F g <sup>-1</sup> at 25 A g <sup>-1</sup>   | 7            |
| Co <sub>3</sub> O <sub>4</sub> nanoflowers grown on Ni foam                                         | 1936.7 F g <sup>-1</sup> at 0.2 A g <sup>-1</sup> | 1309.4 F g <sup>-1</sup> at 3 A g <sup>-1</sup> | 8            |
| Co <sub>3</sub> O <sub>4</sub> nanocrystals derived from zeolitic imidazolate framework on Ni foam  | 1680 F g <sup>-1</sup> at 0.5 A g <sup>-1</sup>   | 980 F g <sup>-1</sup> at 15 A g <sup>-1</sup>   | Present work |

## References

1. Y. Jiang, L. Chen, H. Zhang, Q. Zhang, W. Chen, J. Zhu and D. Song, *Chemical Engineering Journal*, 2016, 292, 1-12.
2. M. Yao, Z. Hu, Z. Xu and Y. Liu, *Journal of Alloys and Compounds*, 2015, 644, 721-728.
3. Y. Zheng, Z. Li, J. Xu, T. Wang, X. Liu, X. Duan, Y. Ma, Y. Zhou and C. Pei, *Nano Energy*, 2016, 20, 94-107.
4. Y. Zou, I. A. Kinloch and R. A. Dryfe, *ACS Appl Mater Interfaces*, 2015, 7, 22831-22838.
5. Y. Liu, W. Yu, L. Hou, G. He and Z. Zhu, *RSC Adv.*, 2015, 5, 75105-75110.
6. Y. Wang, A. Pan, Q. Zhu, Z. Nie, Y. Zhang, Y. Tang, S. Liang and G. Cao, *Journal of Power Sources*, 2014, 272, 107-112.
7. Z. Hai, L. Gao, Q. Zhang, H. Xu, D. Cui, Z. Zhang, D. Tsoukalas, J. Tang, S. Yan and C. Xue, *Applied Surface Science*, 2016, 361, 57-62.
8. X. Qing, S. Liu, K. Huang, K. Lv, Y. Yang, Z. Lu, D. Fang and X. Liang, *Electrochimica Acta*, 2011, 56, 4985-4991.
